# Supplementary material for: Exploring the Distinct Distribution of Archaeal Communities in Sites Contaminated with Explosives
Source: MDPI journal article supplement (doi:10.3390/biom12040489), 2022-03-23
Supplement: s1 [file s1]

**Table S1.** Table represent different diversity Indices for SITE1, SITE2 and control samples.

| S. No   | Sample ID | Simpson_1-D | Shannon_H | Evenness_e^H/S | Chao-1 |
|---------|-----------|-------------|-----------|----------------|--------|
| SITE 1  |           |             |           |                |        |
| 1       | NS1       | 0.9654      | 2.308     | 0.6703         | 21     |
| 2       | NS2       | 0.9256      | 2.747     | 0.5775         | 29.63  |
| 3       | NS3       | 0.9502      | 2.919     | 0.6387         | 31.55  |
| 4       | NS4       | 0.8333      | 0.7897    | 0.7343         | 3.5    |
| 5       | NS5       | 0.9632      | 2.229     | 0.6634         | 21.2   |
| SITE 2  |           |             |           |                |        |
| 6       | PS1       | 0.7875      | 1.896     | 0.4756         | 15.43  |
| 7       | PS2       | 0.7         | 0.7503    | 0.7059         | 4      |
| 8       | PS3       | 0.915       | 2.24      | 0.6708         | 16.5   |
| 9       | PS4       | 0.7841      | 1.911     | 0.4223         | 25     |
| 10      | PS5       | 0.9643      | 1.531     | 0.6605         | 14.5   |
| 11      | PS6       | 0.7967      | 2.081     | 0.4008         | 38.33  |
| 12      | PS7       | 0.7872      | 1.951     | 0.3909         | 44     |
| 13      | PS8       | 0.6382      | 1.266     | 0.4435         | 13     |
| 14      | PS9       | 0.9251      | 2.848     | 0.5948         | 29.43  |
| CONTROL |           |             |           |                |        |
| 15      | C1        | 0.7968      | 2.169     | 0.3978         | 31.17  |
| 16      | C2        | 0.7999      | 2.223     | 0.4017         | 32.43  |

**Table S2.** Table represents the total number of paired end reads, processed reads, total number of OTU's picked and the identified archaeal OTUs in SITE 1, SITE 2 and control samples.

| Sample Name                                                       | Total paired end reads | Processed reads | Total OTU's observed | Identified Archaeal OTU's |
|-------------------------------------------------------------------|------------------------|-----------------|----------------------|---------------------------|
| Amplicon data of 16S rRNA (V3-V4) (with Archaea specific primers) |                        |                 |                      |                           |
| N.S1                                                              | 863002                 | 597959          | 825                  | 30                        |
| N.S2                                                              | 1321670                | 1015934         | 6568                 | 175                       |
| N.S3                                                              | 879177                 | 660790          | 2428                 | 166                       |
| N.S4                                                              | 96762                  | 71420           | 247                  | 7                         |
| N.S5                                                              | 549749                 | 419619          | 709                  | 32                        |
| P.S1                                                              | 316699                 | 240027          | 2796                 | 59                        |
| P.S2                                                              | 432244                 | 271311          | 2834                 | 8                         |
| P.S3                                                              | 740513                 | 512931          | 1638                 | 63                        |
| P.S4                                                              | 356945                 | 272748          | 3359                 | 56                        |
| P.S5                                                              | 242797                 | 171727          | 354                  | 18                        |
| P.S6                                                              | 358931                 | 265078          | 3189                 | 78                        |
| P.S7                                                              | 328031                 | 255932          | 2926                 | 53                        |
| P.S8                                                              | 257147                 | 193803          | 1585                 | 28                        |
| P.S9                                                              | 878478                 | 618450          | 6300                 | 208                       |
| C1                                                                | 1084424                | 962822          | 10750                | 332                       |
| C2                                                                | 985392                 | 866059          | 9939                 | 282                       |

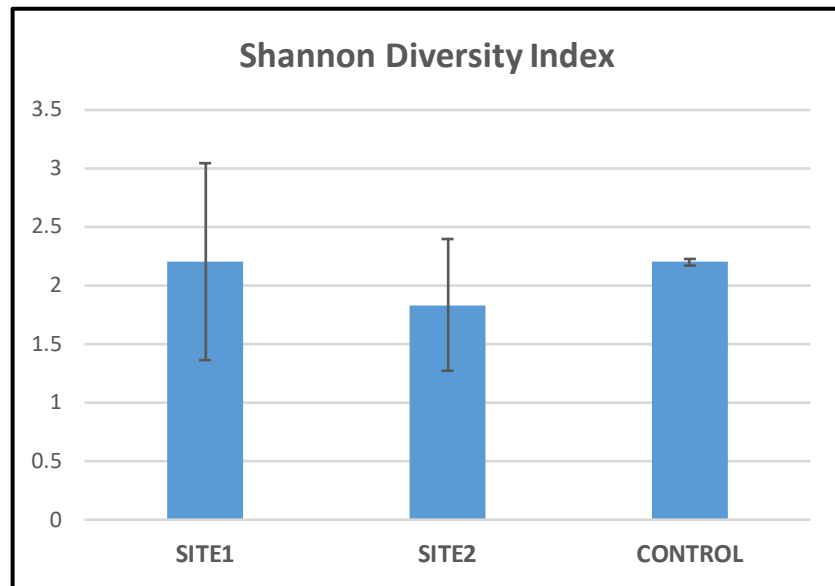

**Figure S1.** The image represents collective Shannon diversity in SITE1, SITE2 and control samples. Error bars represent standard deviation.

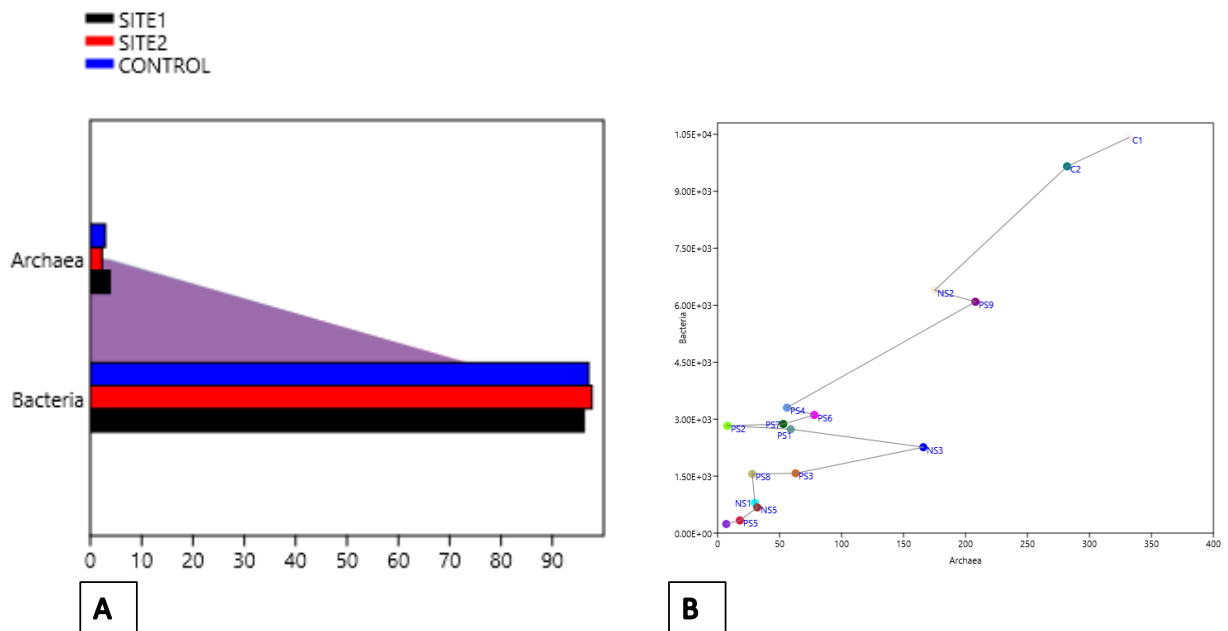

**Figure S2.** (A) OTU based relative *Bacteria* and *Archaea* ratio in SITE1, SITE2 and control samples; (B) OTU based relative *Bacteria* and *Archaea* ratio between SITE1, SITE2 and control samples. Image was constructed using PAST software.

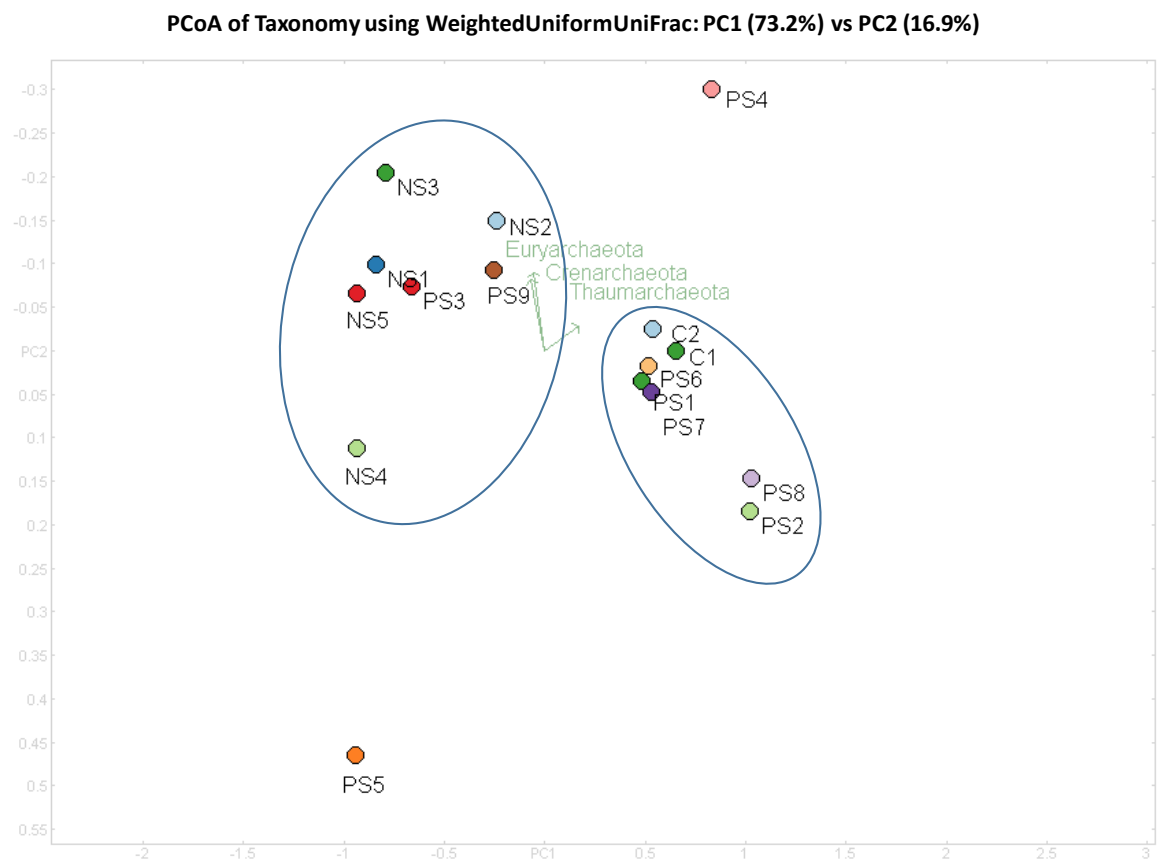

**Figure S3.** PCoA plot of samples at phylum level using Weighted-Uniform-UniFrac distance. Tri-plot arrow represent the projection of phylum for respective samples. Images were constructed in MEGAN.

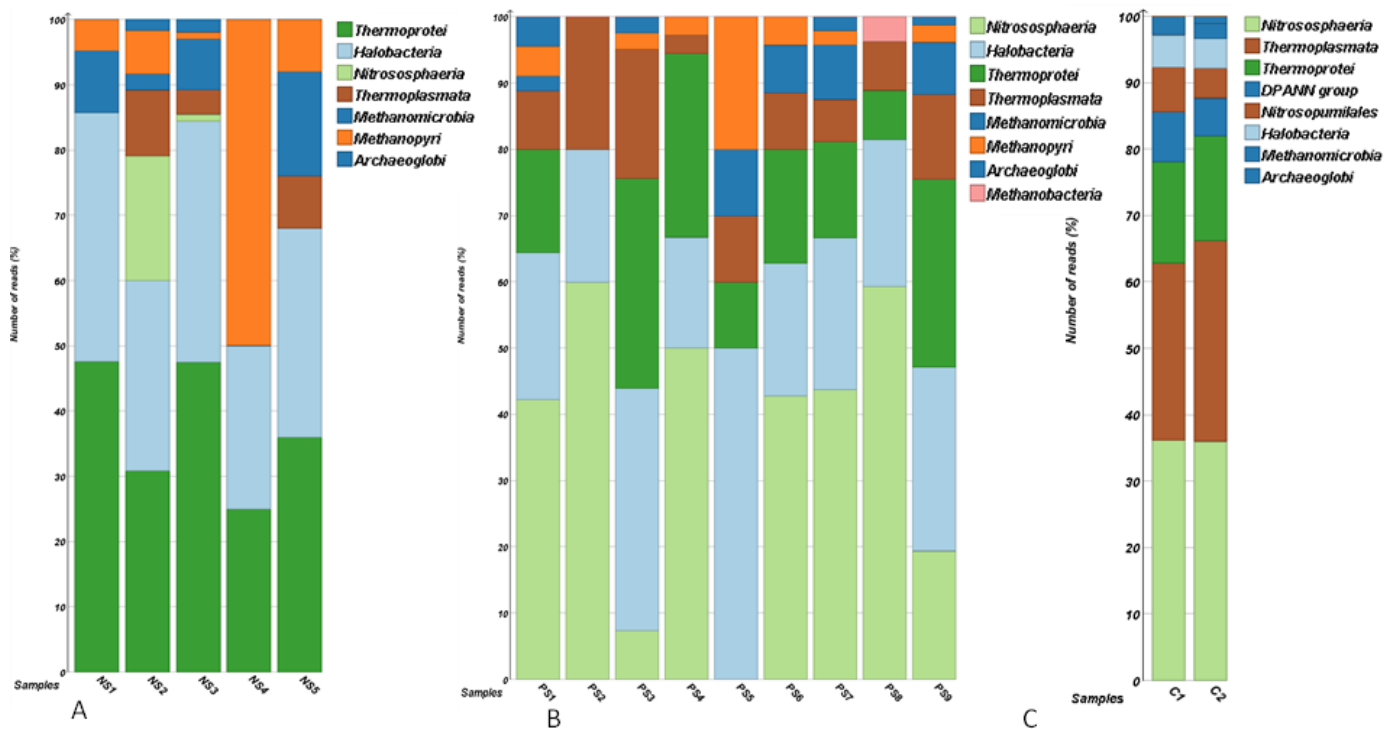

**Figure S4.** Bar chart represent class level distribution. A) Represent SITE1; B) SITE2; and C) Control samples.

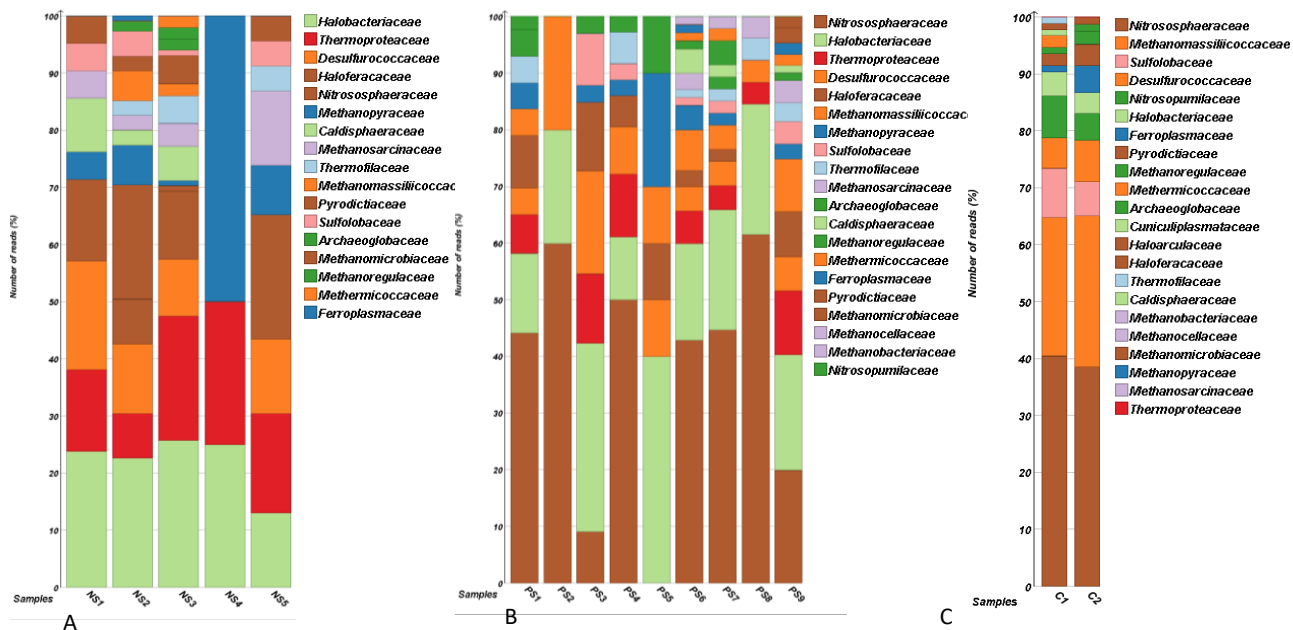

**Figure S5.** Bar charts represent family level distribution. (A,B) Represent SITE1; SITE2; and (C) Control samples.

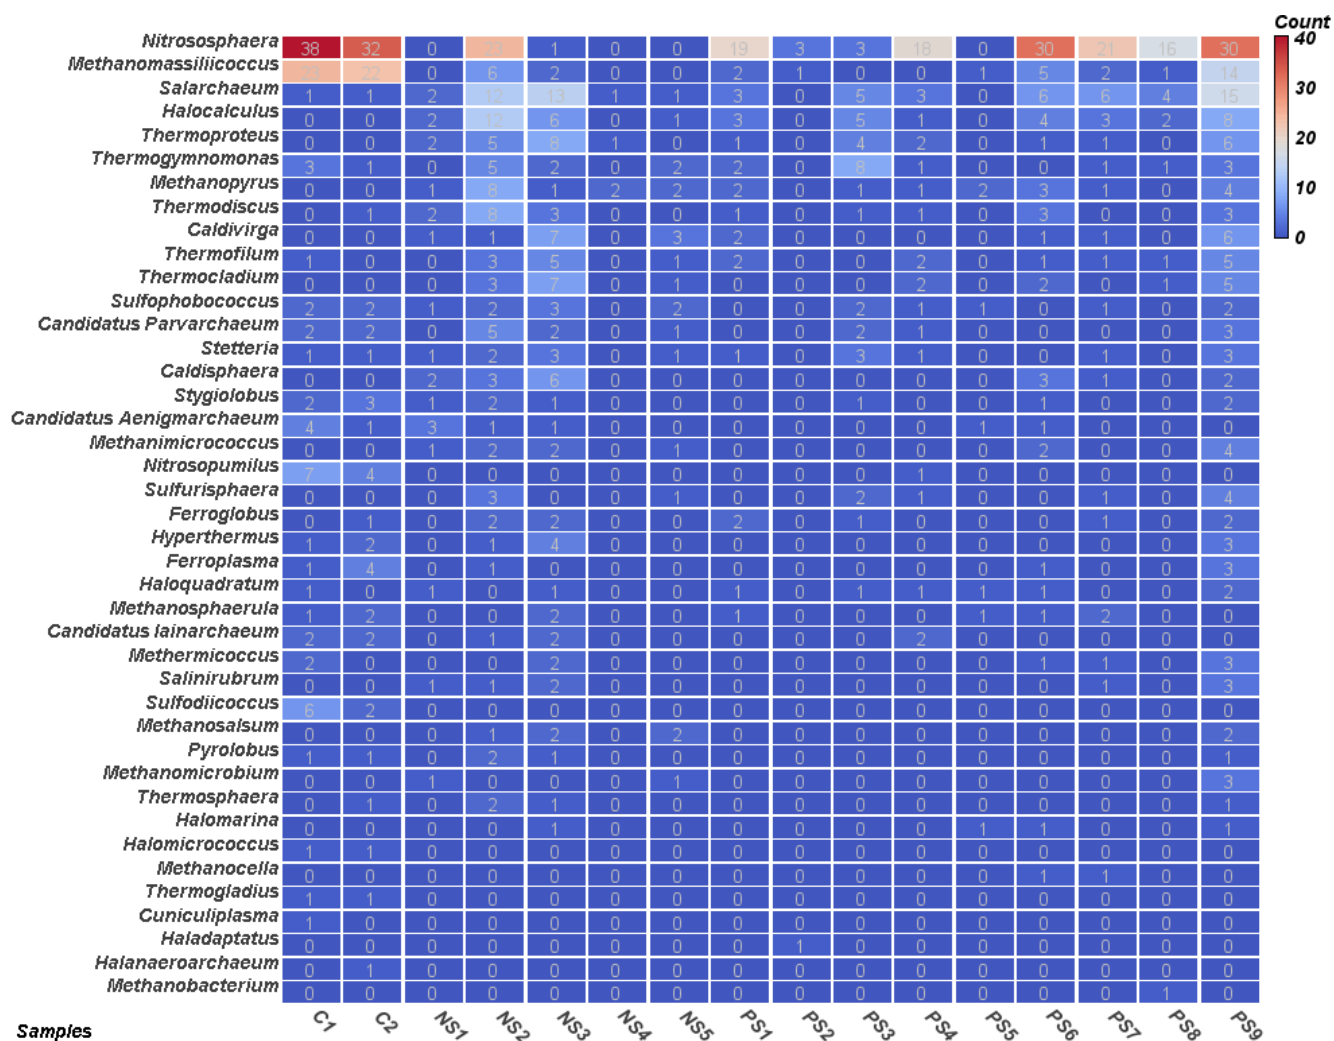

**Figure S6.** Image represents genus level distribution in Control, SITE1 and SITE2 samples. Legends represent the respective OTU counts.

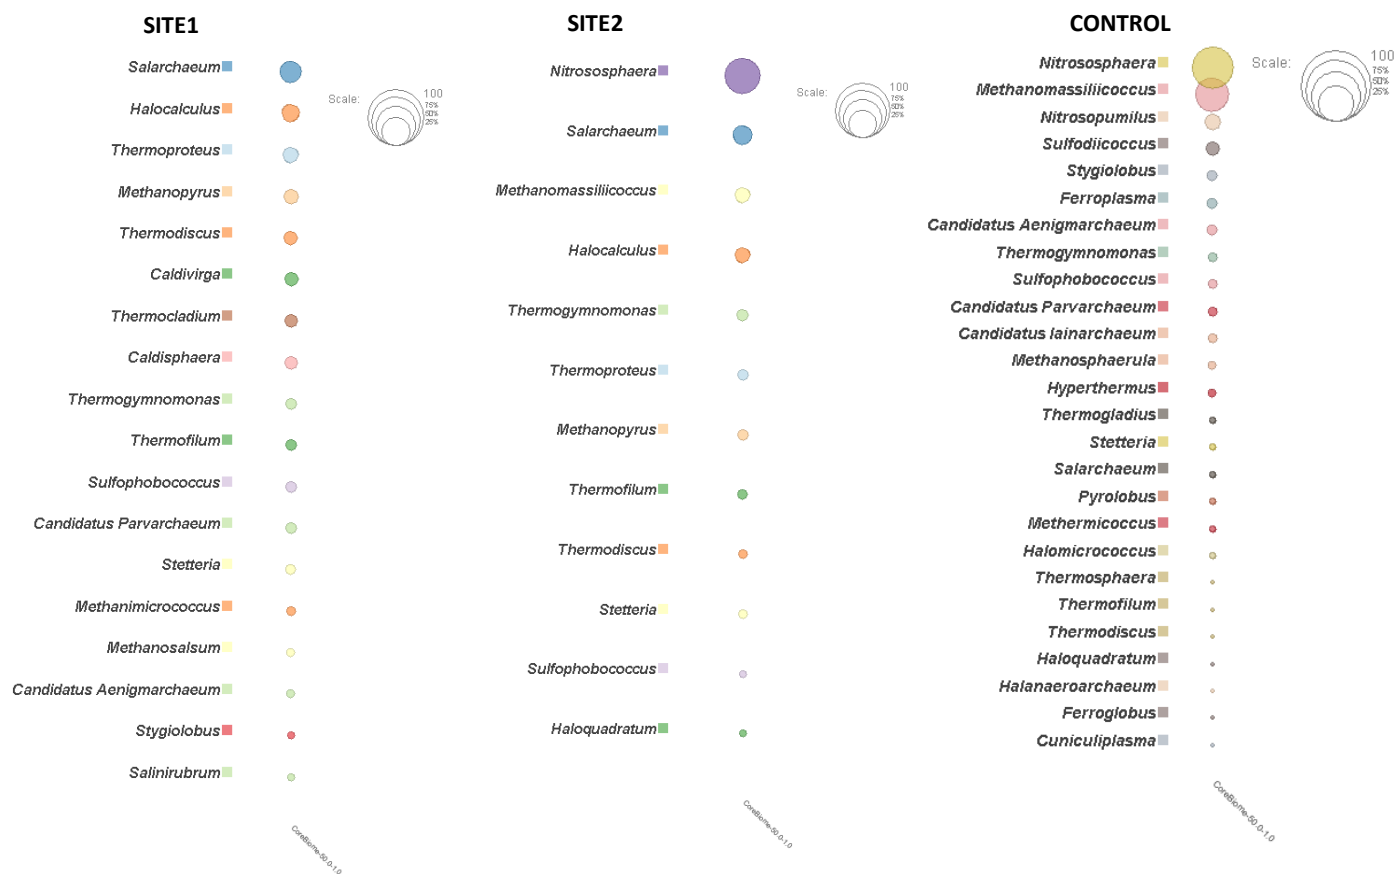

**Figure S7.** Bubble plot represents core-biome composition in SITE1, SITE2 and control samples. Scale represents percent distribution for respective taxa.

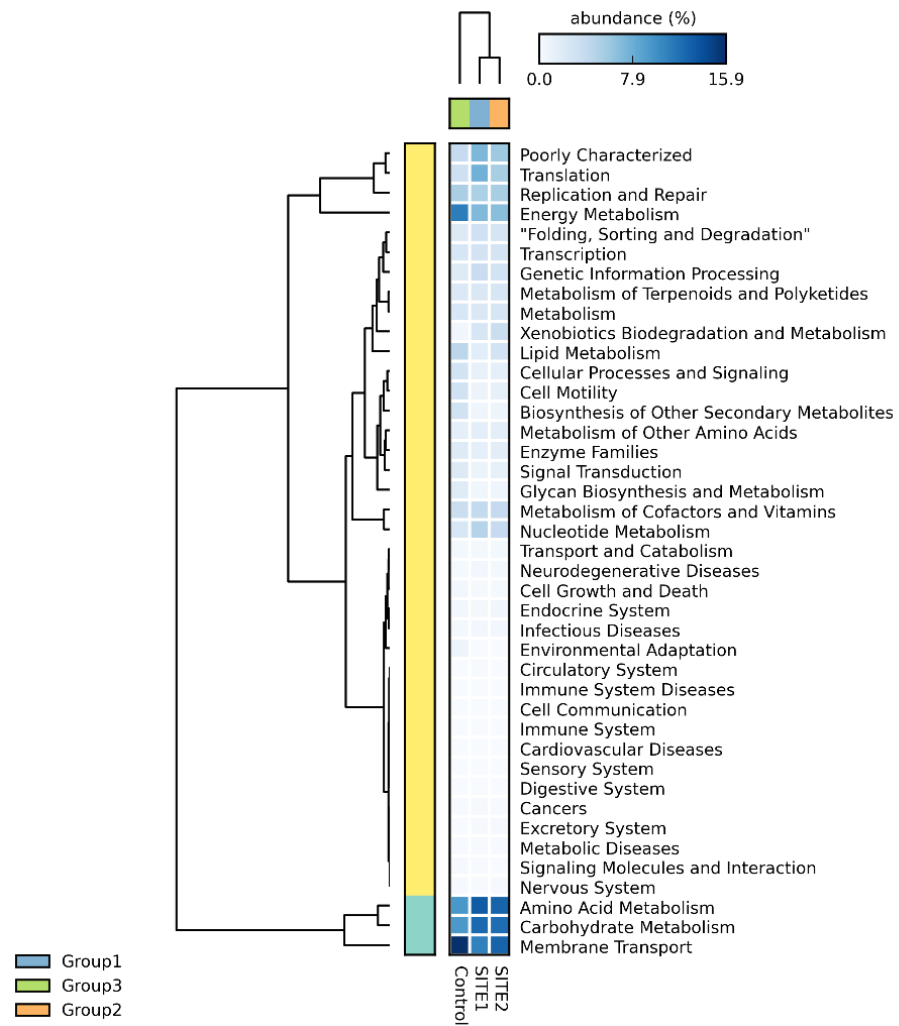

**Figure S8.** Heatmap represent distribution of metabolic pathways in SITE1, SITE2, and Control (un-contaminated samples C1 and C2) based on KEGG pathways (Hierarchy level 2). Image was constructed based on data from PICRUSt pipeline in STAMP software.

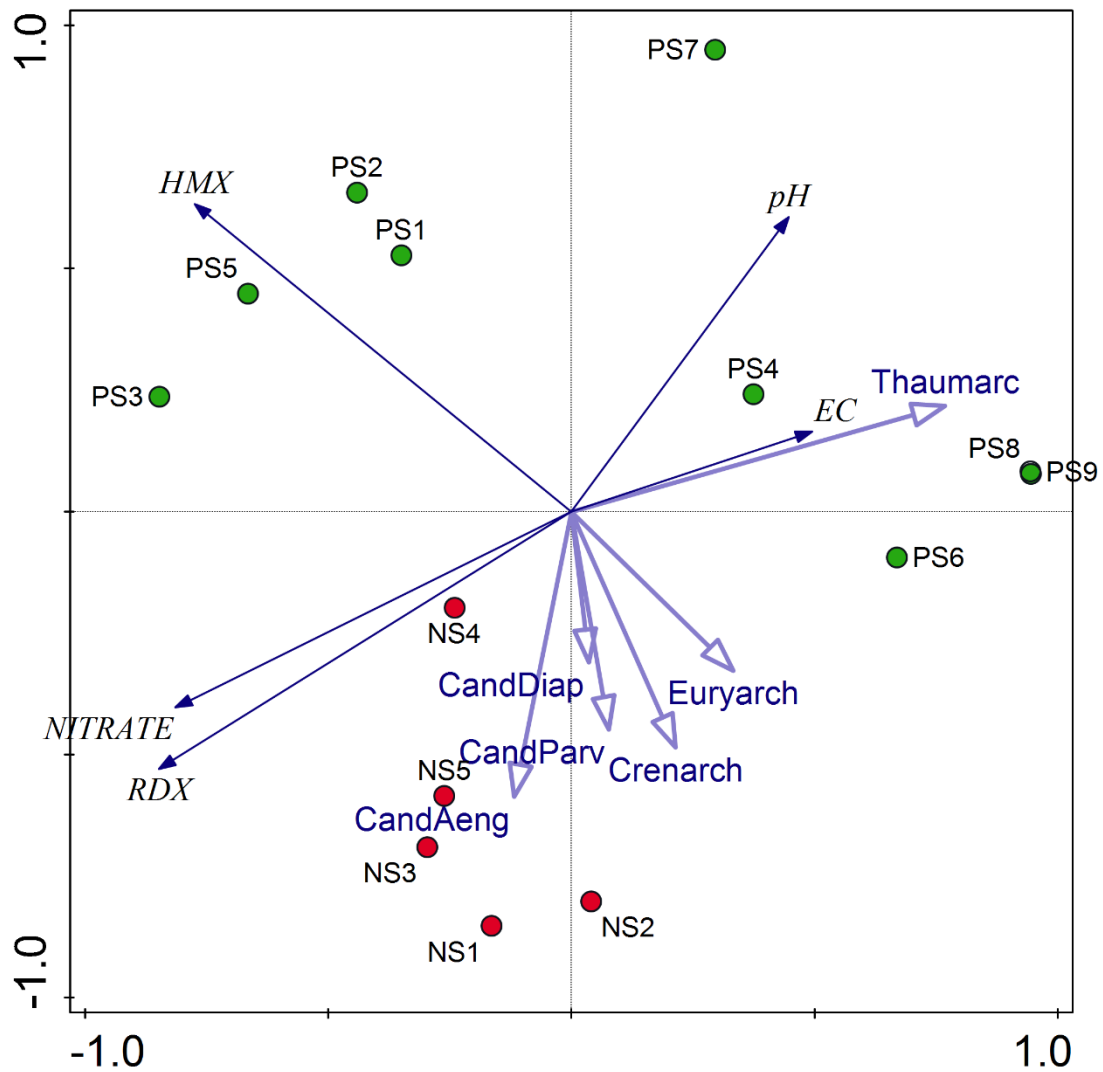

**Figure S9.** Unconstrained PCA plot constructed using linear ordination method represents environmental variables and the archaeal taxa. Filled dots represent samples from SITE1 and SITE2. Image was constructed in Canoco version 5.10 [35].

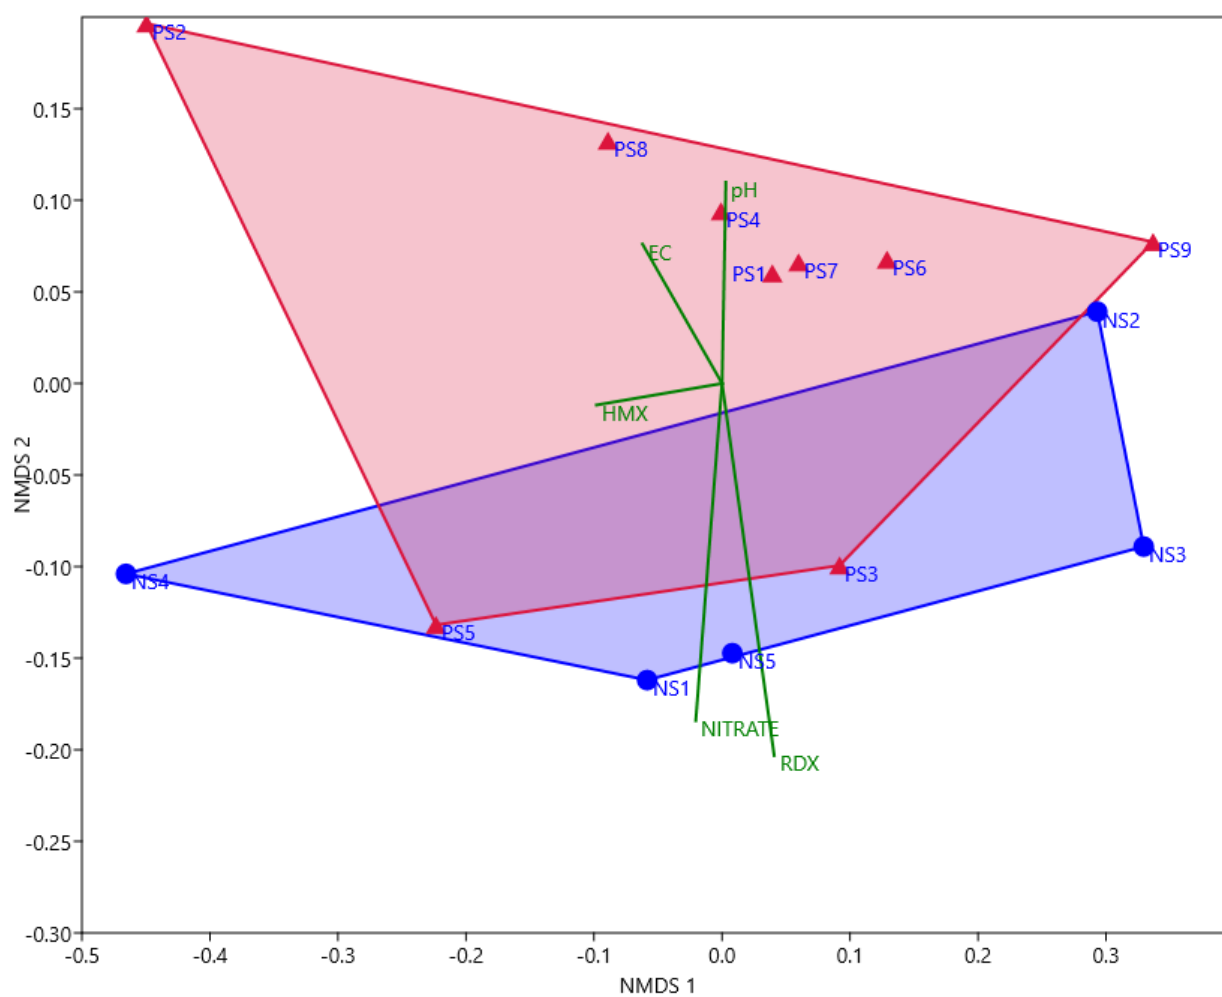

**Figure S10.** Non-metric multidimensional scaling (NMDS) plot at phylum level. Triplot represent environmental variables. Filled triangles represent samples from SITE2 filled squares represent samples from SITE1. NMDS was based on Bray-Curtis index.
